# Supplementary material
Source: publisher site journal article supplement (doi:10.18632/aging.204408)
Supplement: Supplementary file 1 [file aging-v14-204408-supplementary-material-SD1.pdf]

## SUPPLEMENTARY FIGURE

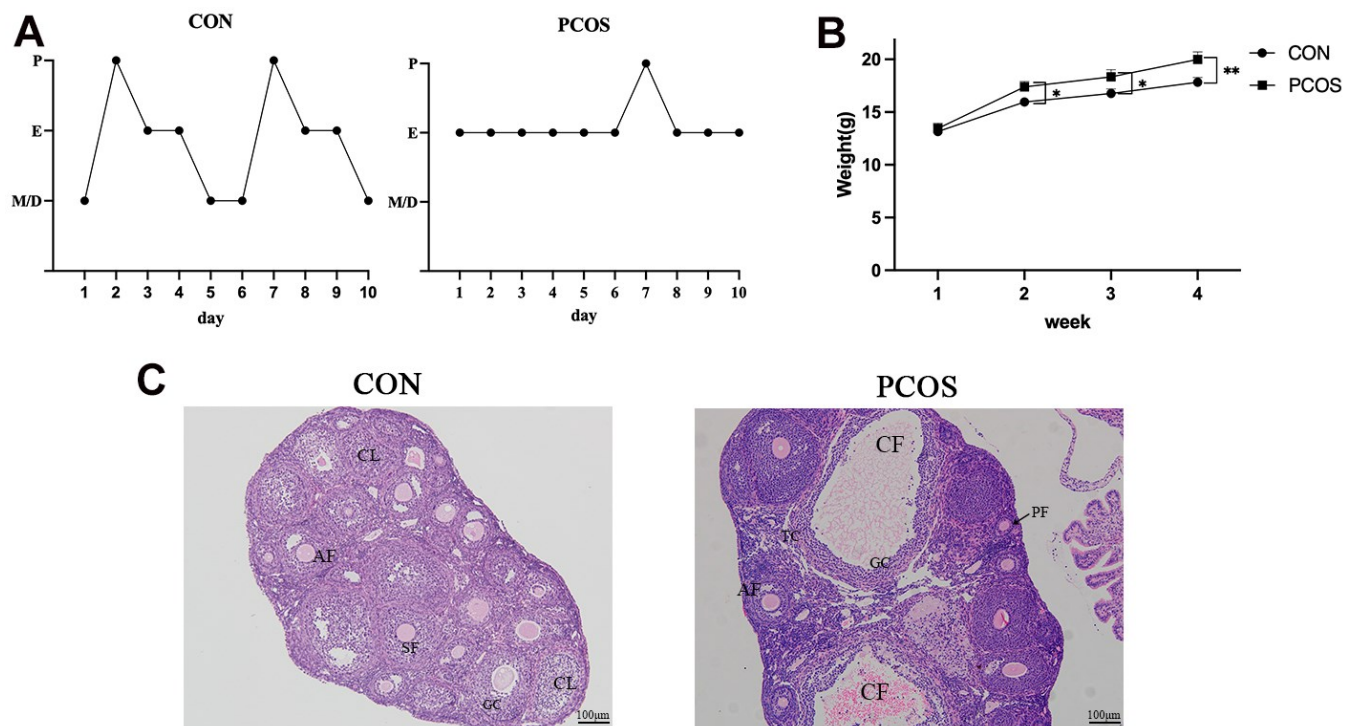

**Supplementary Figure 1. The establishment of DHEA-induced PCOS models.** (A) Estrous cycle analyses of mice in each group via vaginal smears. (B) Weight change in each group. (C) Representative images of HE staining of morphological features of the ovaries in each group. Proestrus (P), estrus (E), metestrus (M) and diestrus (D). Primary follicles (PFs), granulosa cells (GCs), theca cells (TCs), secondary follicles (SFs), antral follicles (AFs), corpus luteum (CL), and cystic follicles (CFs). \* $P < 0.05$ , \*\*  $P < 0.01$ .
